# Supplementary material for: Munc13 supports fusogenicity of non-docked vesicles at synapses with disrupted active zones
Source: eLife. 2022 Nov 18;11:e79077. doi: 10.7554/eLife.79077 (PMC9822248; doi:10.7554/eLife.79077)
Supplement: Source data 1. — Means, SEMs, statistical tests and p-values for Figures 1—6 and figure supplements. [file elife-79077-data1.xlsx]

## Sheet: Figure 1
Figure	Parameter	Genotype	Value (mean ± SEM)	n	Statistical test	p-value
1C	NMDAR-EPSC amplitude (pA)	controlR+E	1254.7 ± 106.0	20 cells/3 cultures	Welch's t-test	<0.001
		cKOR+E	197.0 ± 17.1	19 cells/3 cultures
1E	IPSC amplitude (nA)	controlR+E	5.450 ± 0.247	18 cells/3 cultures	Welch's t-test	0.006
		cKOR+E	0.953 ± 0.122	18 cells/3 cultures
1F	IPSC 20-80% rise time (ms)	controlR+E	1.70 ± 0.12	18 cells/3 cultures	Welch's t-test	<0.001
		cKOR+E	3.29 ± 0.30	18 cells/3 cultures
1H	PSD-95 levels (a.u.)	controlR+E	-	60 synapses/3 cultures	two-way ANOVA	distance: <0.001; genotype: 0.0579
		cKOR+E		60 synapses/3 cultures		interaction: >0.999
1I	Munc13-1 levels (a.u.)	controlR+E	-	60 synapses/3 cultures	two-way ANOVA	distance: <0.001; genotype: <0.001
		cKOR+E		60 synapses/3 cultures		interaction: <0.001
1J	PSD-95 peak (a.u.)	controlR+E	100.4 ± 3.1	60 synapses/3 cultures	students t-test	0.324
		cKOR+E	96.3 ± 2.8	60 synapses/3 cultures
1K	Munc13-1 peak (a.u.)	controlR+E	131.5 ± 4.4	60 synapses/3 cultures	students t-test	<0.001
		cKOR+E	46.6 ± 3.5	60 synapses/3 cultures

## Sheet: Figure 2
Figure	Parameter	Genotype	Value (mean ± SEM)	n	Statistical test	p-value
2C	PSD-95 levels (a.u.)	controlR+E+M	-	65 synapses/3 cultures	two-way ANOVA	distance: <0.001; genotype: 0.930
		cKOR+E+M		66 synapses/3 cultures		interaction: 0.020
2D	RIM1 levels (a.u.)	controlR+E+M	-	65 synapses/3 cultures	two-way ANOVA	distance: <0.001; genotype: <0.001
		cKOR+E+M		66 synapses/3 cultures		interaction: <0.001
2E	PSD-95 peak (a.u.)	controlR+E+M	98.8 ± 2.8	65 synapses/3 cultures	students t-test	0.404
		cKOR+E+M	95.8 ± 2.3	66 synapses/3 cultures
2F	RIM1 peak (a.u.)	controlR+E+M	121.7 ± 3.6	65 synapses/3 cultures	Welch's t-test	<0.001
		cKOR+E+M	43.8 ± 2.8	66 synapses/3 cultures
2H	PSD-95 levels (a.u.)	controlR+E+M	-	63 synapses/3 cultures	two-way ANOVA	distance: <0.001; genotype: <0.001
		cKOR+E+M		63 synapses/3 cultures		interaction: 0.0244
2I	Munc13-1 levels (a.u.)	controlR+E+M	-	63 synapses/3 cultures	two-way ANOVA	distance: <0.001; genotype: <0.001
		cKOR+E+M		63 synapses/3 cultures		interaction: <0.001
2J	PSD-95 peak (a.u.)	controlR+E+M	100.1 ± 3.3	63 synapses/3 cultures	students t-test	0.0627
		cKOR+E+M	107.8 ± 2.6	63 synapses/3 cultures
2K	Munc13-1 peak (a.u.)	controlR+E+M	123.6 ± 3.6	63 synapses/3 cultures	Welch's t-test	<0.001
		cKOR+E+M	27.4 ± 1.4	63 synapses/3 cultures
2M	Synaptophysin density (puncta/µm2)	controlR+E+M	0.14 ± 0.01	17 images/3 cultures	students t-test	0.221
		cKOR+E+M	0.13 ± 0.01	17 images/3 cultures
2N	Synaptophysin intensity (a.u.)	controlR+E+M	121.9 ± 5.2	17 images/3 cultures	students t-test	0.704
		cKOR+E+M	119.5 ± 3.5	17 images/3 cultures
2O	Synaptophysin area (µm2)	controlR+E+M	0.52 ± 0.02	17 images/3 cultures	students t-test	0.721
		cKOR+E+M	0.53 ± 0.02	17 images/3 cultures

## Sheet: Figure 3
Figure	Parameter	Genotype	Value (mean ± SEM)	n	Statistical test	p-value
3B	docked vesicles	controlR+E+M	2.2 ± 0.2	99 synapses/2 cultures	Welch's t-test	<0.001
		cKOR+E+M	0.4 ± 0.1	100 synapses/2 cultures
3C	total vesicles	controlR+E+M	71.5 ± 4.0	99 synapses/2 cultures	Welch's t-test	<0.001
		cKOR+E+M	54.4 ± 3.0	100 synapses/2 cultures
3D	bouton size (µm2)	controlR+E+M	0.91 ± 0.04	99 synapses/2 cultures	students t-test	0.0618
		cKOR+E+M	0.82 ± 0.03	100 synapses/2 cultures
3E	PSD length (nm)	controlR+E+M	461.46 ± 23.04	99 synapses/2 cultures	students t-test	0.028
		cKOR+E+M	537.94 ± 25.73	100 synapses/2 cultures

## Sheet: Figure 4
Figure	Parameter	Genotype	Value (mean ± SEM)	n	Statistical test	p-value
4B	mEPSC frequency (Hz)	controlR+E+M	0.98 ± 0.15	27 cells/3 cultures	Mann-Whitney test	<0.001
		cKOR+E+M	0.27 ± 0.03	27 cells/3 cultures
4C	mEPSC amplitude (pA)	controlR+E+M	19.84 ± 0.73	27 cells/3 cultures	Mann-Whitney test	0.595
		cKOR+E+M	19.54 ± 0.90	27 cells/3 cultures
4E	mIPSC frequency (Hz)	controlR+E+M	2.72 ± 0.30	22 cells/3 cultures	Mann-Whitney test	<0.001
		cKOR+E+M	0.48 ± 0.13	22 cells/3 cultures
4F	mIPSC amplitude (pA)	controlR+E+M	26.31 ± 0.94	22 cells/3 cultures	Mann-Whitney test	0.08
		cKOR+E+M	24.75 ± 1.57	22 cells/3 cultures
4H	NMDAR-EPSC amplitude (pA)	controlR+E+M	897.5 ± 71.7	20 cells/3 cultures	Mann-Whitney test	<0.001
		cKOR+E+M	91.3 ± 8.5	20 cells/3 cultures
4J	IPSC amplitude (nA)	controlR+E+M	4.681 ± 0.313	28 cells/3 cultures	Mann-Whitney test	<0.001
		cKOR+E+M	0.333 ± 0.058	31 cells/3 cultures
4K	IPSC 20-80% rise time (ms)	controlR+E+M	1.64 ± 0.09	28 cells/3 cultures	Welch’s t-test	<0.001
		cKOR+E+M	2.35 ± 0.13	31 cells/3 cultures
4L	normalized NMDAR-EPSC amplitude	cKOR+E	0.167 ± 0.018	19 cells/3 cultures	Welch’s t-test	0.0033
		cKOR+E+M	0.101 ± 0.008	20 cells/3 cultures
4M	normalized IPSC amplitude	cKOR+E	0.177 ± 0.023	18 cells/3 cultures	Mann-Whitney test	0.0013
		cKOR+E+M	0.089 ± 0.017	31 cells/3 cultures

## Sheet: Figure 5
Figure	Parameter	Genotype	Value (mean ± SEM)	n	Statistical test	p-value
5B	sucrose EPSC 0-10 s charge (nC)	controlR+E	4.91 ± 0.33	18 cells/3 cultures	Mann-Whitney test	<0.001
		cKOR+E	0.89 ± 0.12	17 cells/3 cultures
5D	sucrose IPSC 0-10 s charge (nC)	controlR+E	12.71 ± 0.90	18 cells/3 cultures	Welch’s t-test	<0.001
		cKOR+E	3.75 ± 0.30	18 cells/3 cultures
5F	sucrose EPSC 0-10 s charge (nC)	controlR+E+M	7.30 ± 0.58	23 cells/3 cultures	Mann-Whitney test	<0.001
		cKOR+E+M	0.42 ± 0.07	23 cells/3 cultures
5H	sucrose IPSC 0-10 s charge (nC)	controlR+E+M	10.89 ± 0.88	21 cells/3 cultures	Mann-Whitney test	<0.001
		cKOR+E+M	1.96 ± 0.41	21 cells/3 cultures
5I	normalized sucrose EPSC	cKOR+E	0.179 ± 0.023	17 cells/3 cultures	Mann-Whitney test	<0.001
	(0-10 s charge)	cKOR+E+M	0.060 ± 0.010	23 cells/3 cultures
5J	normalized sucrose IPSC	cKOR+E	0.296 ± 0.024	18 cells/3 cultures	Mann-Whitney test	0.0025
	(0-10 s charge)	cKOR+E+M	0.186 ± 0.040	21 cells/3 cultures

## Sheet: Figure 6
Figure	Parameter		Genotype	Value (mean ± SEM)	n	Statistical test	p-value
6B	NMDAR-EPSC		controlR+E	-	15 cells/3 cultures	two-way ANOVA	interval: <0.001; genotype: <0.001
	paired pulse ratio		cKOR+E		16 cells/3 cultures		interaction: <0.001
	NMDAR-EPSC	50 ms	controlR+E	1.257 ± 0.058	15 cells/3 cultures	Bonferroni’s post-hoc	<0.001
			cKOR+E	1.762 ± 0.084	16 cells/3 cultures
		100 ms	controlR+E	1.172 ± 0.070	15 cells/3 cultures	Bonferroni’s post-hoc	<0.001
			cKOR+E	1.652 ± 0.088	16 cells/3 cultures
	paired pulse ratio	500 ms	controlR+E	0.930 ± 0.032	15 cells/3 cultures	Bonferroni’s post-hoc	0.018
			cKOR+E	1.093 ± 0.045	16 cells/3 cultures
		2500 ms	controlR+E	0.966 ± 0.018	15 cells/3 cultures	Bonferroni’s post-hoc	0.898
			cKOR+E	1.002 ± 0.026	16 cells/3 cultures
6D	evoked IPSC		controlR+E	-	17 cells/3 cultures	two-way ANOVA	interval: <0.001; genotype: <0.001
	paired pulse ratio		cKOR+E		17 cells/3 cultures		interaction: <0.001
	evoked IPSC	20 ms	controlR+E	0.414 ± 0.058	17 cells/3 cultures	Bonferroni’s post-hoc	<0.001
			cKOR+E	1.006 ± 0.064	17 cells/3 cultures
		50 ms	controlR+E	0.635 ± 0.052	17 cells/3 cultures	Bonferroni’s post-hoc	<0.001
			cKOR+E	1.160 ± 0.064	17 cells/3 cultures
		100 ms	controlR+E	0.797 ± 0.035	17 cells/3 cultures	Bonferroni’s post-hoc	<0.001
	paired pulse ratio		cKOR+E	1.037 ± 0.039	17 cells/3 cultures
		500 ms	controlR+E	0.849 ± 0.018	17 cells/3 cultures	Bonferroni’s post-hoc	0.075
			cKOR+E	0.931 ± 0.026	17 cells/3 cultures
		2500 ms	controlR+E	0.895 ± 0.008	17 cells/3 cultures	Bonferroni’s post-hoc	>0.999
			cKOR+E	0.914 ± 0.013	17 cells/3 cultures
6F	NMDAR-EPSC		controlR+E+M	-	19 cells/3 cultures	two-way ANOVA	interval: <0.001; genotype: <0.001
	paired pulse ratio		cKOR+E+M		19 cells/3 cultures		interaction: <0.001
	NMDAR-EPSC	50 ms	controlR+E+M	1.207 ± 0.068	19 cells/3 cultures	Bonferroni’s post-hoc	<0.001
			cKOR+E+M	1.669 ± 0.053	19 cells/3 cultures
		100 ms	controlR+E+M	1.170 ± 0.061	19 cells/3 cultures	Bonferroni’s post-hoc	<0.001
			cKOR+E+M	1.522 ± 0.043	19 cells/3 cultures
	paired pulse ratio	500 ms	controlR+E+M	0.993 ± 0.015	19 cells/3 cultures	Bonferroni’s post-hoc	0.005
			cKOR+E+M	1.123 ± 0.033	19 cells/3 cultures
		2500 ms	controlR+E+M	0.969 ± 0.010	19 cells/3 cultures	Bonferroni’s post-hoc	>0.999
			cKOR+E+M	0.966 ± 0.023	19 cells/3 cultures
6H	evoked IPSC		controlR+E+M	-	19 cells/3 cultures	two-way ANOVA	interval: <0.001; genotype: <0.001
	paired pulse ratio		cKOR+E+M		19 cells/3 cultures		interaction: <0.001
	evoked IPSC	20 ms	controlR+E+M	0.458 ± 0.030	19 cells/3 cultures	Bonferroni’s post-hoc	<0.001
			cKOR+E+M	0.986 ± 0.053	19 cells/3 cultures
		50 ms	controlR+E+M	0.584 ± 0.029	19 cells/3 cultures	Bonferroni’s post-hoc	<0.001
			cKOR+E+M	1.113 ± 0.067	19 cells/3 cultures
		100 ms	controlR+E+M	0.720 ± 0.032	19 cells/3 cultures	Bonferroni’s post-hoc	<0.001
	paired pulse ratio		cKOR+E+M	0.976 ± 0.032	19 cells/3 cultures
		500 ms	controlR+E+M	0.850 ± 0.014	19 cells/3 cultures	Bonferroni’s post-hoc	0.64
			cKOR+E+M	0.894 ± 0.025	19 cells/3 cultures
		2500 ms	controlR+E+M	0.910 ± 0.008	19 cells/3 cultures	Bonferroni’s post-hoc	>0.999
			cKOR+E+M	0.942 ± 0.035	19 cells/3 cultures
6I	normalized NMDAR-EPSC	50 ms	cKOR+E	1.386 ± 0.071	16 cells/3 cultures	Mann-Whitney test	0.909
			cKOR+E+M	1.385 ± 0.060	19 cells/3 cultures
		100 ms	cKOR+E	1.403 ± 0.071	16 cells/3 cultures	Mann-Whitney test	0.172
			cKOR+E+M	1.301 ± 0.034	19 cells/3 cultures
	paired pulse ratio	500 ms	cKOR+E	1.191 ± 0.044	16 cells/3 cultures	Mann-Whitney test	0.301
			cKOR+E+M	1.134 ± 0.033	19 cells/3 cultures
		2500 ms	cKOR+E	1.044 ± 0.025	16 cells/3 cultures	Mann-Whitney test	0.333
			cKOR+E+M	0.995 ± 0.024	19 cells/3 cultures
6J	normalized IPSC	20 ms	cKOR+E	2.470 ± 0.171	17 cells/3 cultures	Mann-Whitney test	0.244
			cKOR+E+M	2.160 ± 0.120	19 cells/3 cultures
		50 ms	cKOR+E	1.823 ± 0.096	17 cells/3 cultures	Mann-Whitney test	0.827
			cKOR+E+M	1.910 ± 0.118	19 cells/3 cultures
		100 ms	cKOR+E	1.302 ± 0.048	17 cells/3 cultures	Mann-Whitney test	0.49
	paired pulse ratio		cKOR+E+M	1.355 ± 0.044	19 cells/3 cultures
		500 ms	cKOR+E	1.096 ± 0.028	17 cells/3 cultures	Mann-Whitney test	0.471
			cKOR+E+M	1.055 ± 0.032	19 cells/3 cultures
		2500 ms	cKOR+E	1.021 ± 0.016	17 cells/3 cultures	Mann-Whitney test	0.271
			cKOR+E+M	1.036 ± 0.040	19 cells/3 cultures

## Sheet: Figure 1 - figure supplement 1
Figure	Parameter	Genotype	Value (mean ± SEM)	n	Statistical test	p-value
1 - S1C	PSD-95 levels (a.u.)	controlM	-	60 synapses/3 cultures	two-way ANOVA	distance: <0.001; genotype: 0.132
		cKOM		60 synapses/3 cultures		interaction: <0.001
1 - S1D	Munc13-1 levels (a.u.)	controlM	-	60 synapses/3 cultures	two-way ANOVA	distance: <0.001; genotype: <0.001
		cKOM		60 synapses/3 cultures		interaction: <0.001
1 - S1E	PSD-95 peak (a.u.)	controlM	95.7 ± 2.4	60 synapses/3 cultures	students t-test	0.0517
		cKOM	89.5 ± 2.0	60 synapses/3 cultures
1 - S1F	Munc13-1 peak (a.u.)	controlM	138.1 ± 3.7	60 synapses/3 cultures	Welch's t-test	<0.001
		cKOM	29.2 ± 1.8	60 synapses/3 cultures
1 - S1G	Munc13-1 levels (normalized)	cKOR+E	-	60 synapses/3 cultures	two-way ANOVA	distance: <0.001; genotype: <0.001
		cKOM		60 synapses/3 cultures		interaction: <0.001
1 - S1H	Synaptophysin levels (a.u.)	controlM	-	60 synapses/3 cultures	two-way ANOVA	distance: <0.001; genotype: 0.454
		cKOM		60 synapses/3 cultures		interaction: 0.940
1 - S1I	Synaptophysin levels (a.u.)	controlR+E	-	60 synapses/3 cultures	two-way ANOVA	distance: <0.001; genotype: 0.148
		cKOR+E		60 synapses/3 cultures		interaction: 0.661

## Sheet: Figure 1 - figure supplement 2
Figure	Parameter	Genotype	Value (mean ± SEM)	n	Statistical test	p-value
1 - S2B	NMDAR-EPSC amplitude (pA)	controlM	905.9 ± 57.1	16 cells/3 cultures	Mann-Whitney test	<0.001
		cKOM	363.4 ± 34.4	16 cells/3 cultures
1 - S2D	IPSC amplitude (nA)	controlM	3.503 ± 0.342	26 cells/3 cultures	Mann-Whitney test	<0.001
		cKOM	0.667 ± 0.168	26 cells/3 cultures
1 - S2E	IPSC 20-80% rise time (ms)	controlM	1.44 ± 0.12	26 cells/3 cultures	Mann-Whitney test	0.24
		cKOM	1.89 ± 0.23	26 cells/3 cultures

## Sheet: Figure 1- figure supplement 3
Figure	Parameter	Genotype	Value (mean ± SEM)	n	Statistical test	p-value
1 - S3B	Munc13-1 levels (a.u.)	controlR+E	60.1 ± 2.2	16 images/3 cultures	Mann-Whitney test	<0.001
		cKOR+E	29.0 ± 1.4	19 images/3 cultures
1 - S3E	Munc13-1 levels (a.u.)	controlM	47.4 ± 1.7	16 images/3 cultures	Welch's t-test	<0.001
		cKOM	13.4 ± 0.6	17 images/3 cultures

## Sheet: Figure 2 - figure supplement 1
Figure	Parameter	Genotype	Value (mean ± SEM)	n	Statistical test	p-value
2 - S1A	Synaptophysin levels (a.u.)	controlR+E+M	-	65 synapses/3 cultures	two-way ANOVA	distance: <0.001; genotype: 0.561
		cKOR+E+M		66 synapses/3 cultures		interaction: <0.001
2 - S1B	Munc13-1 levels (normalized)	cKOR+E	-	60 synapses/3 cultures	two-way ANOVA	distance: <0.001; genotype: <0.001
		cKOR+E+M		63 synapses/3 cultures		interaction: <0.001
2 - S1D	Munc13-1 levels (a.u.)	controlR+E+M	37.2 ± 1.6	15 images/3 cultures	Welch's t-test	<0.001
		cKOR+E+M	12.2 ± 0.7	15 images/3 cultures
2 - S1E	normalized Munc13-1 levels	cKOR+E	0.480 ± 0.021	19 images/3 cultures	Kruskal-Wallis test	cKOR+E vs. cKOM : <0.001;
		cKOM	0.280 ± 0.012	17 images/3 cultures		cKOR+E vs. cKOR+E+M : 0.0011
		cKOR+E+M	0.327 ± 0.016	15 images/3 cultures

[truncated: 3 more sheets: Figure 2 - figure supplement 2, Figure 4 - figure supplement 1, Figure 6 - figure supplement 1]
