# Supplementary figures and images for: Munc13 supports fusogenicity of non-docked vesicles at synapses with disrupted active zones
Source: eLife journal article supplement (doi:10.7554/elife.79077), 2022-11-18

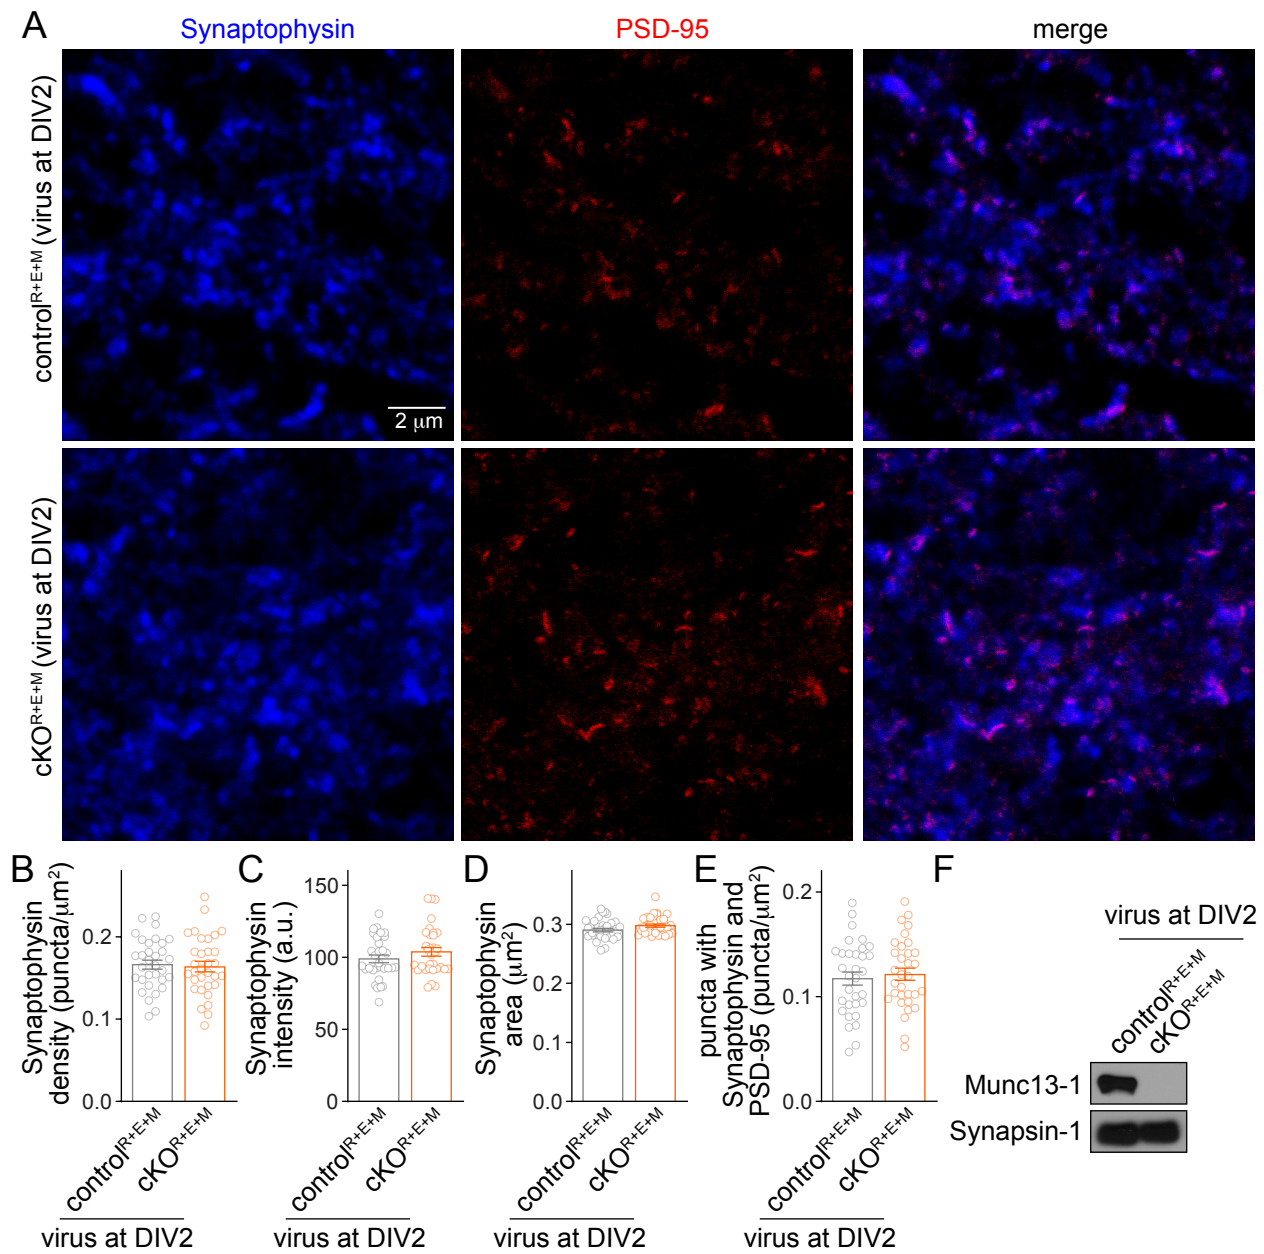

Tan et al., Figure 2 - figure supplement 2

Supplement: supp [file elife-79077-supp-v1.zip]

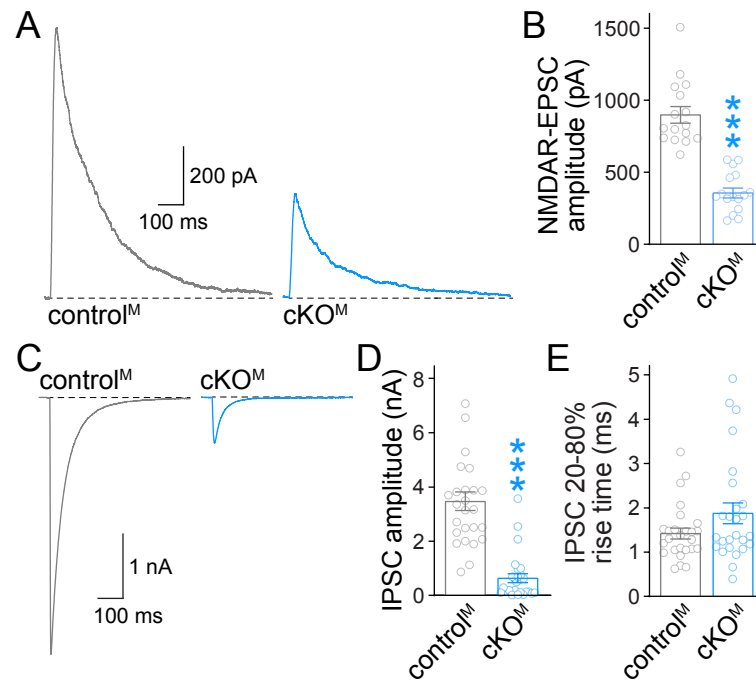

Tan et al., Figure 1- figure supplement 2

Supplement: supp [file elife-79077-supp-v1.zip]

**A** Munc13-1<sup>floxed</sup> X Munc13-2<sup>KO</sup> X Munc13-3<sup>KO</sup>

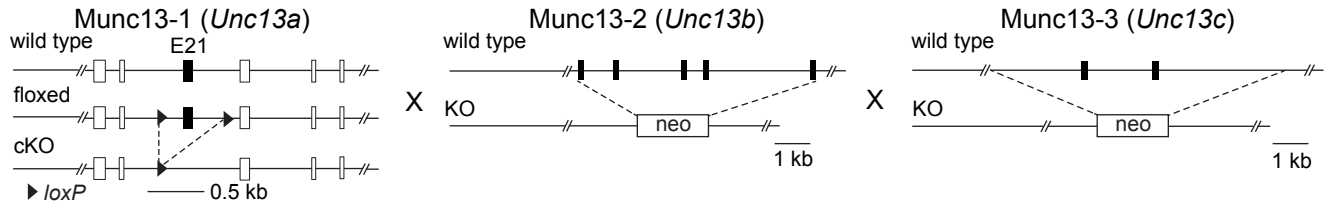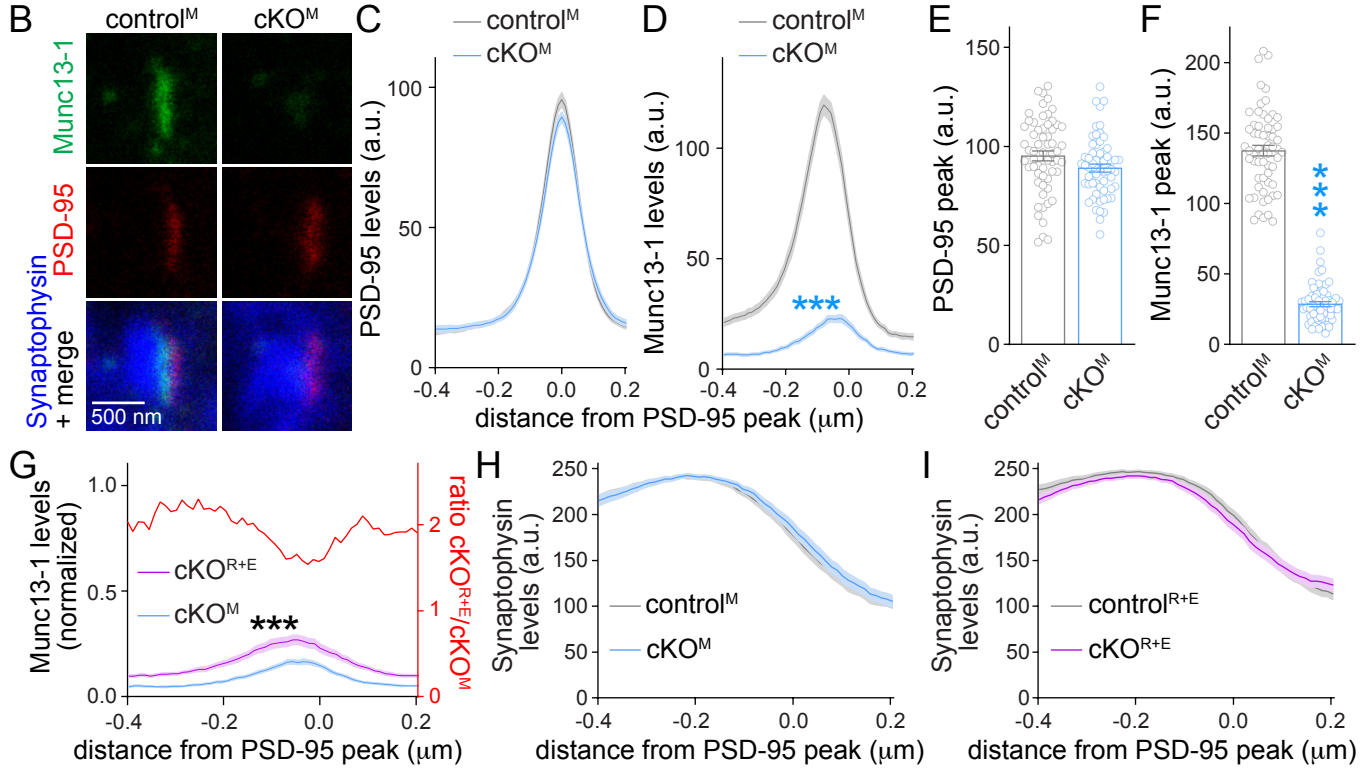

Tan et al., Figure 1 - figure supplement 1

Supplement: supp [file elife-79077-supp-v1.zip]

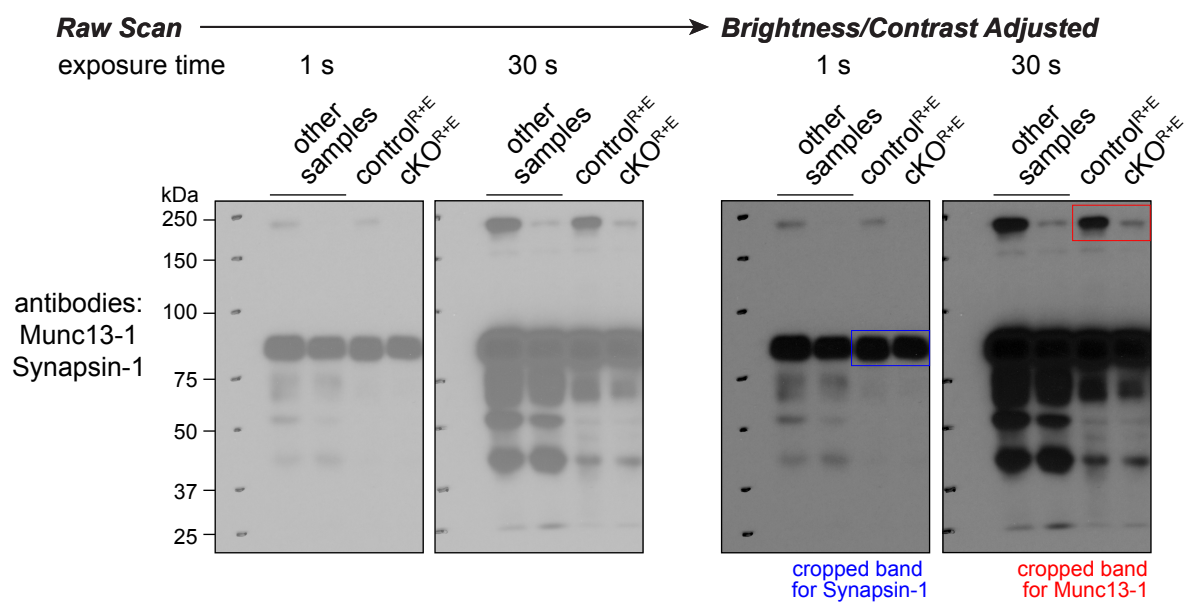

Tan et al., Figure 1 - figure supplement 3 - source data 1B

Supplement: supp [file elife-79077-supp-v1.zip]

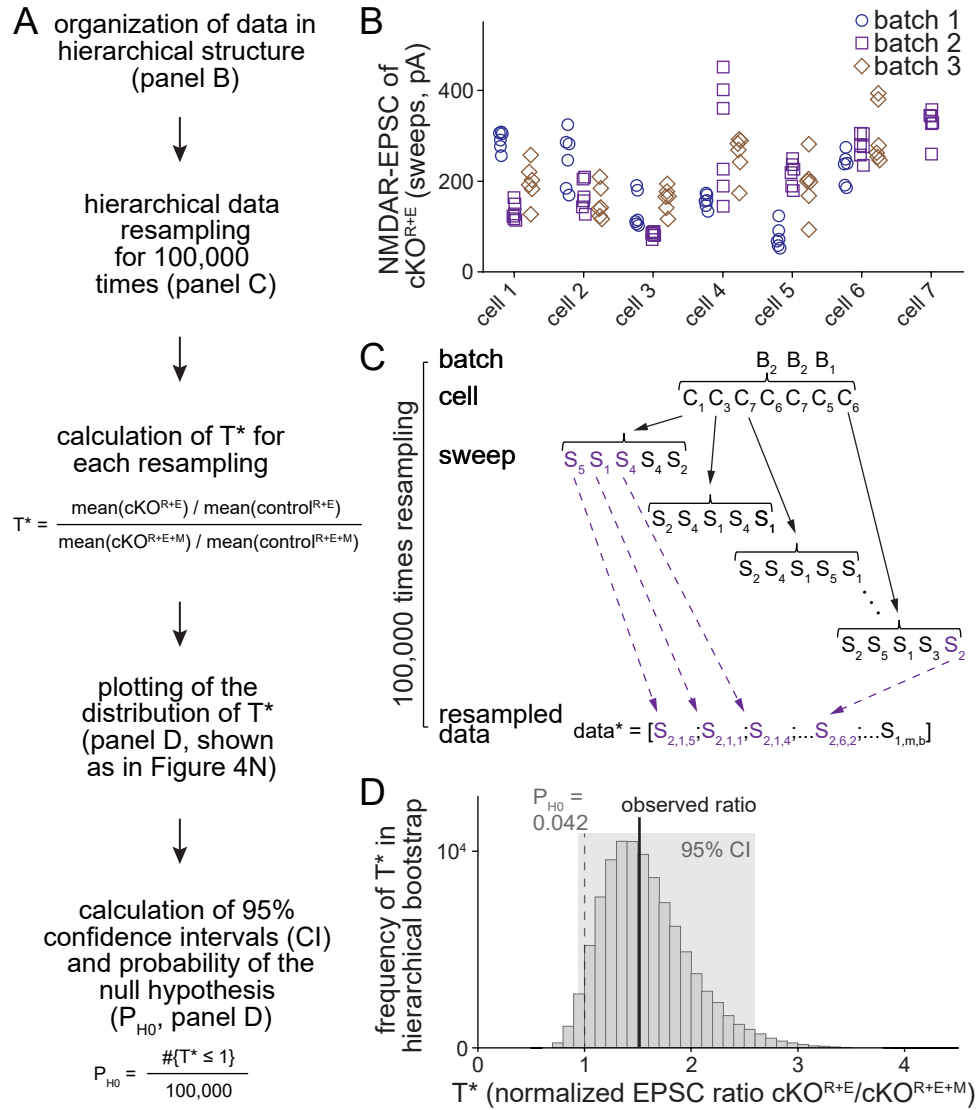

Tan et al., Figure 4 - figure supplement 2

Supplement: supp [file elife-79077-supp-v1.zip]

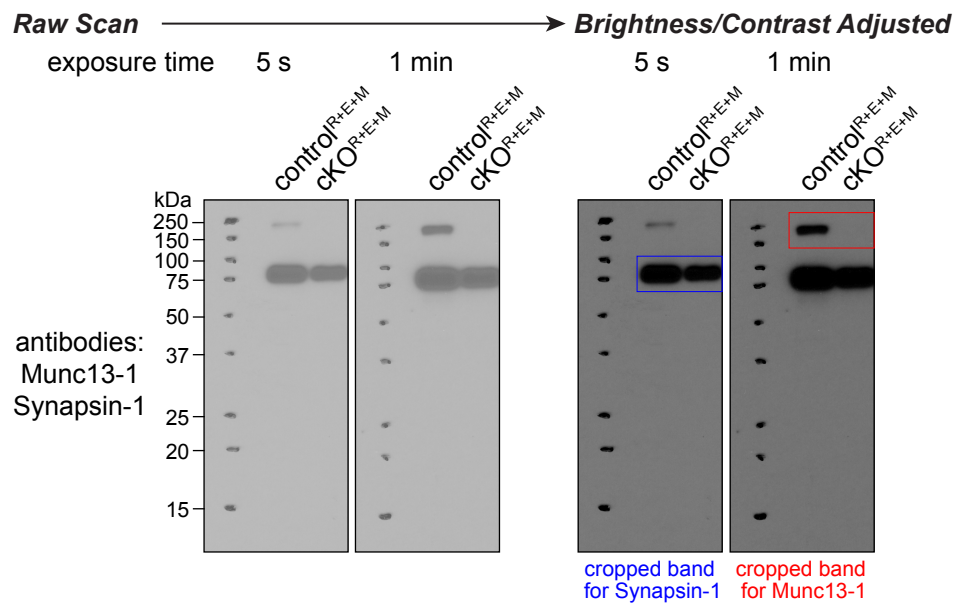

Tan et al., Figure 2 - figure supplement 1 - source data 1

Supplement: supp [file elife-79077-supp-v1.zip]

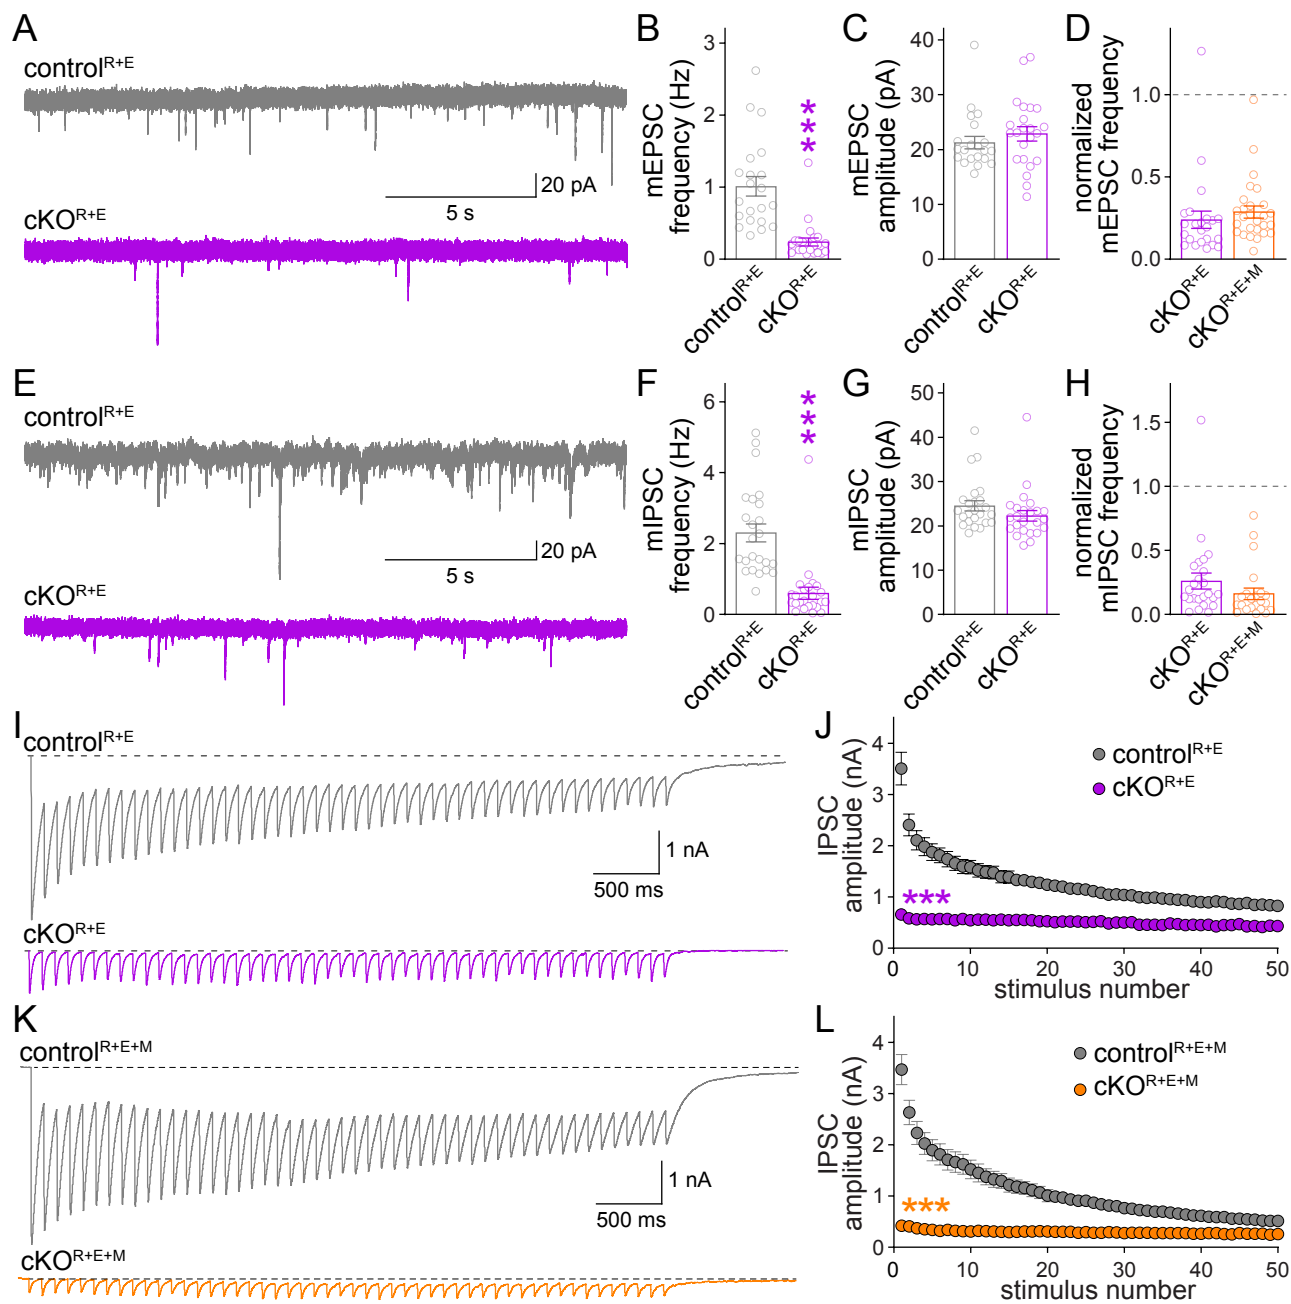

Tan et al., Figure 6 - figure supplement 1

Supplement: supp [file elife-79077-supp-v1.zip]

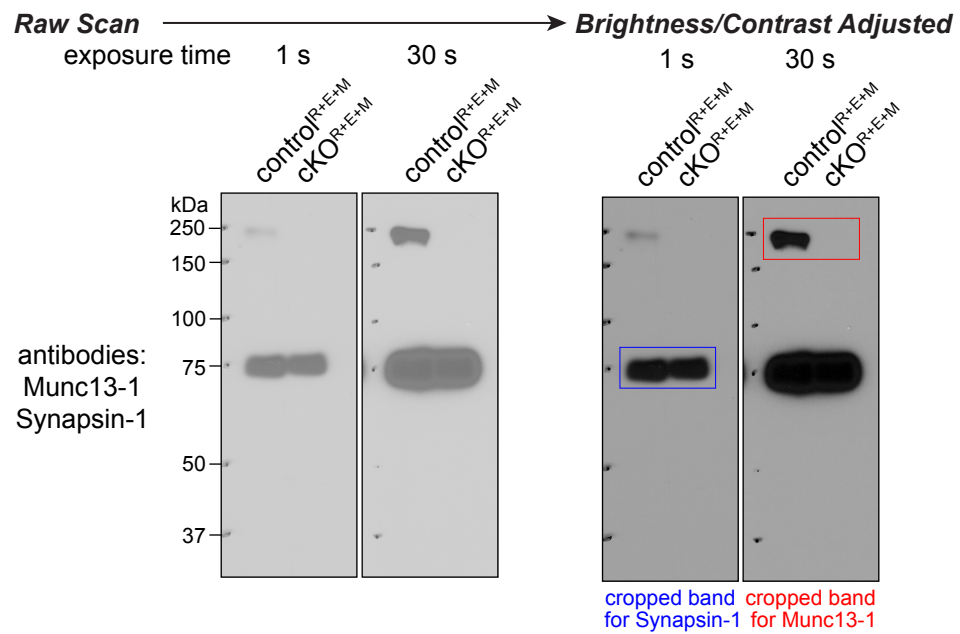

Tan et al., Figure 2 - figure supplement 2 - source data 1

Supplement: supp [file elife-79077-supp-v1.zip]

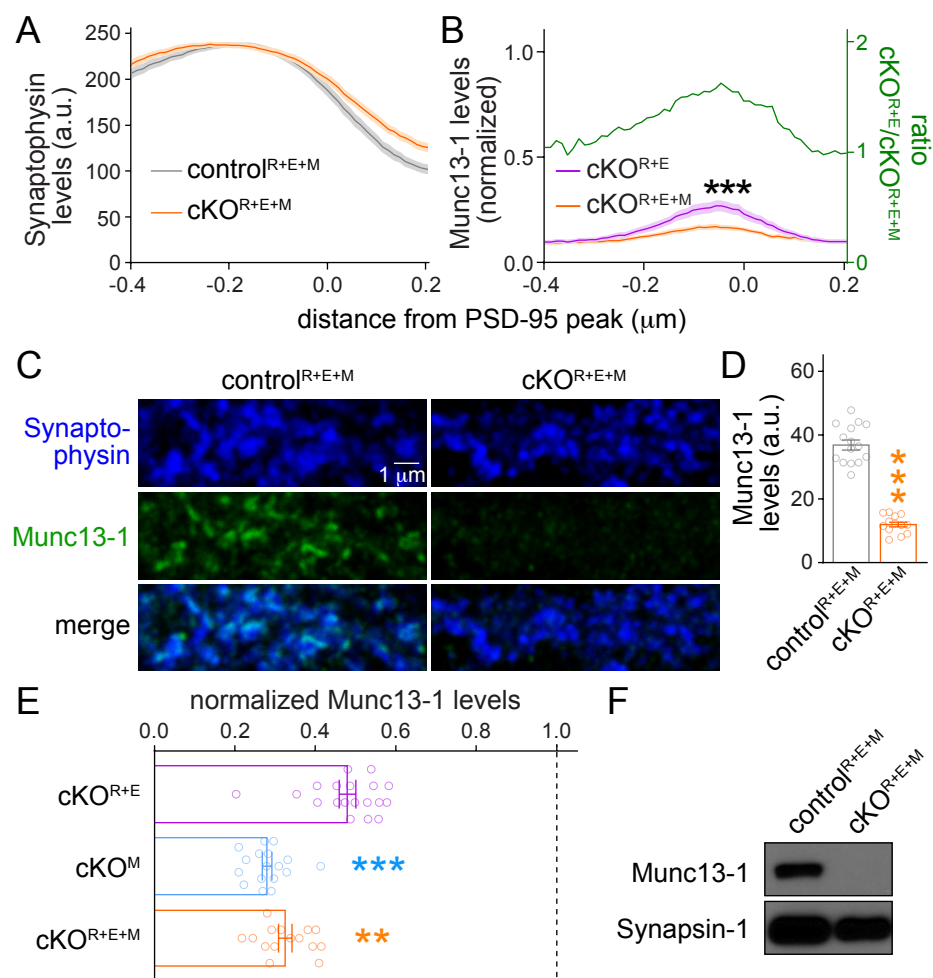

Tan et al., Figure 2 - figure supplement 1

Supplement: supp [file elife-79077-supp-v1.zip]

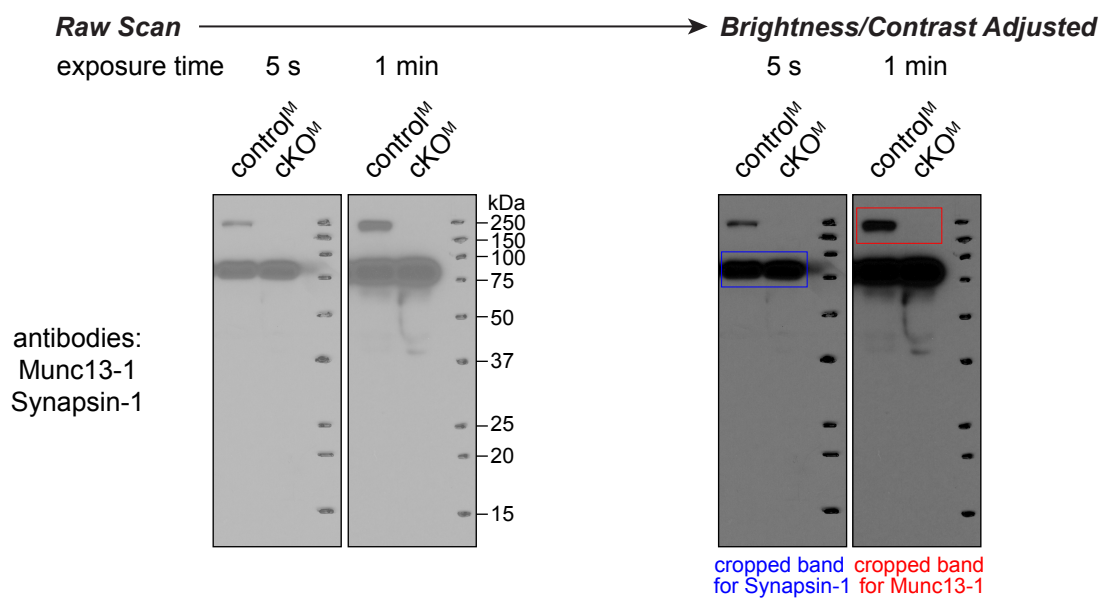

Tan et al., Figure 1 - figure supplement 3 - source data 1D

Supplement: supp [file elife-79077-supp-v1.zip]

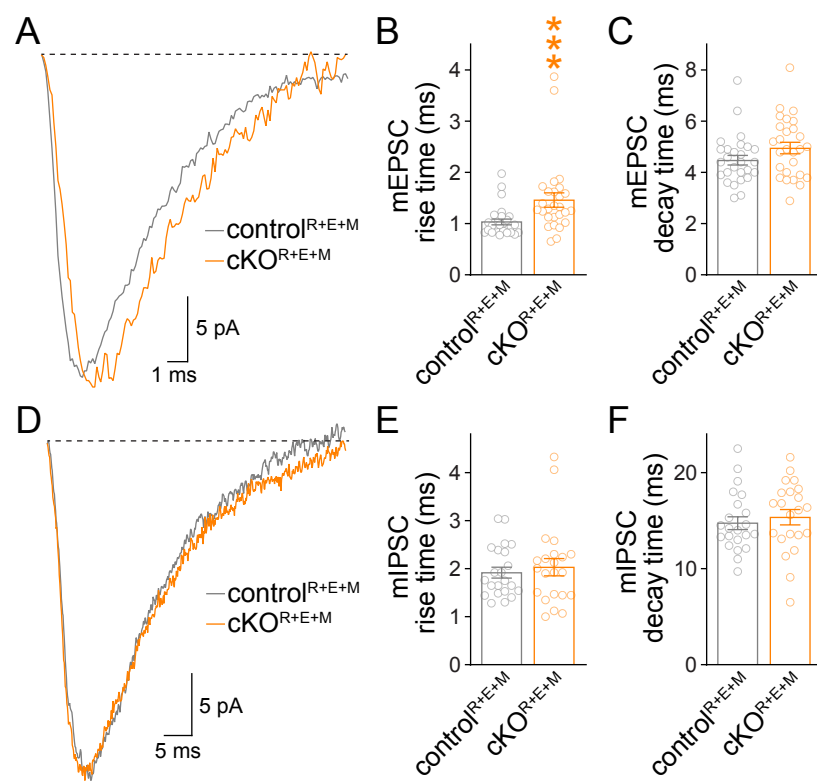

Tan et al., Figure 4 - figure supplement 1

Supplement: supp [file elife-79077-supp-v1.zip]

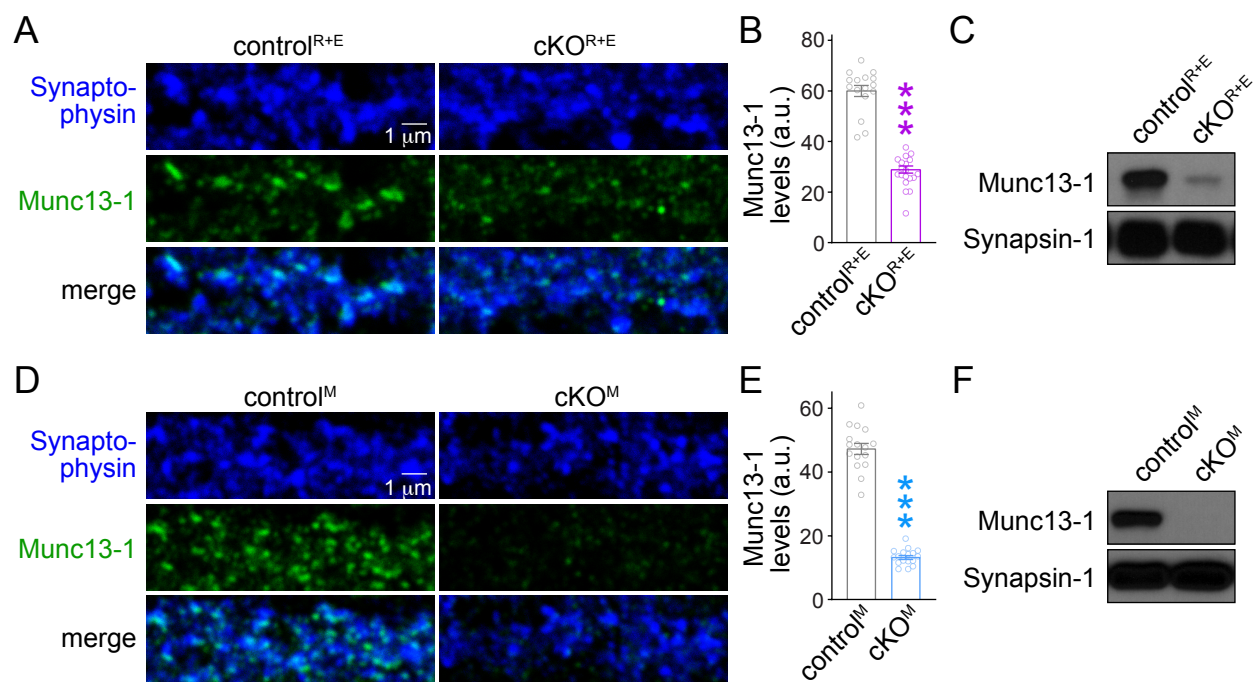

Tan et al., Figure 1 - figure supplement 3

Supplement: supp [file elife-79077-supp-v1.zip]
